# Supplementary material for: Predicting diagnostic conversion from major depressive disorder to bipolar disorder: an EHR based study from Colombia
Source: PubMed Central journal article supplement — medRxiv. 2023 Oct 2:2023.09.28.23296092. Preprint. [Version 1] doi: 10.1101/2023.09.28.23296092 (PMC10593019; doi:10.1101/2023.09.28.23296092), 2023-10-02
Supplement: media-1.pdf [file media-1.pdf]

## Supplementary Figure 1

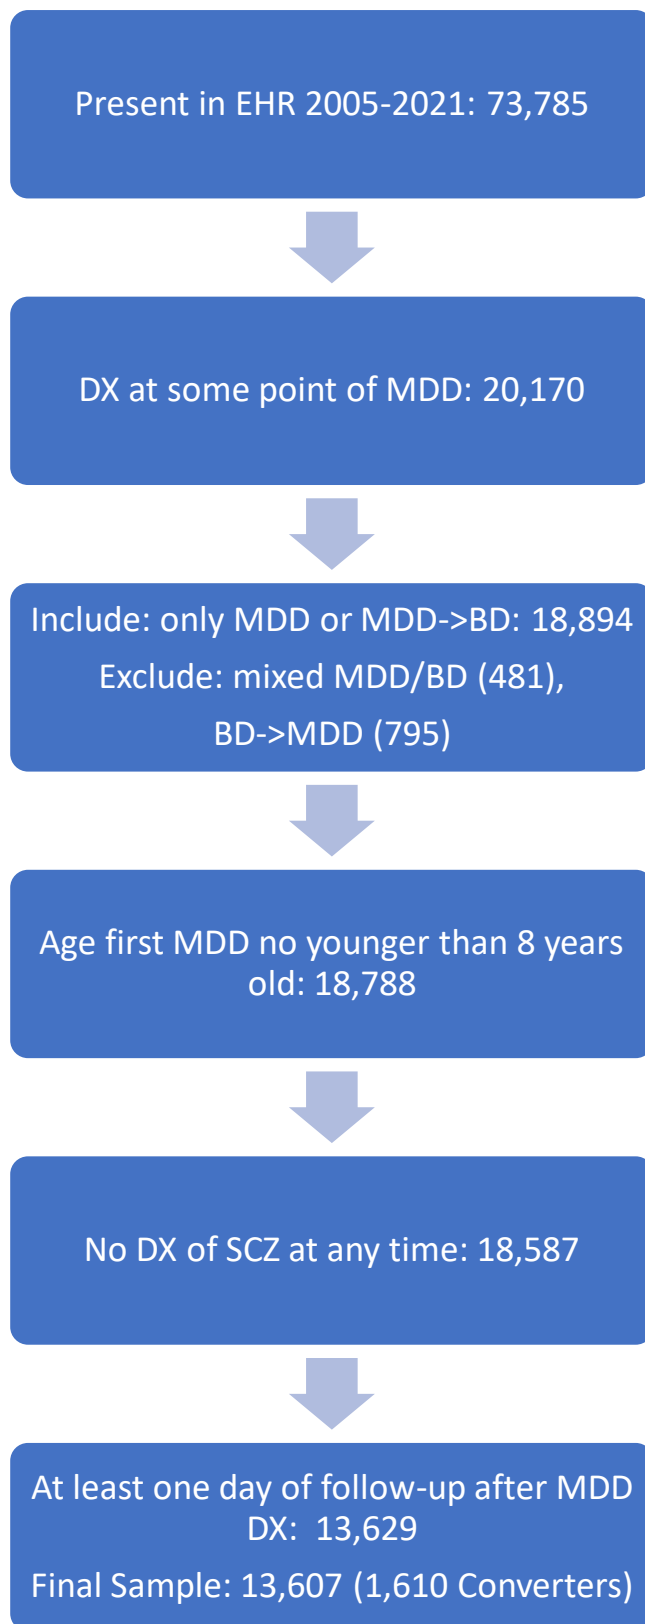

Supplementary Figure 2

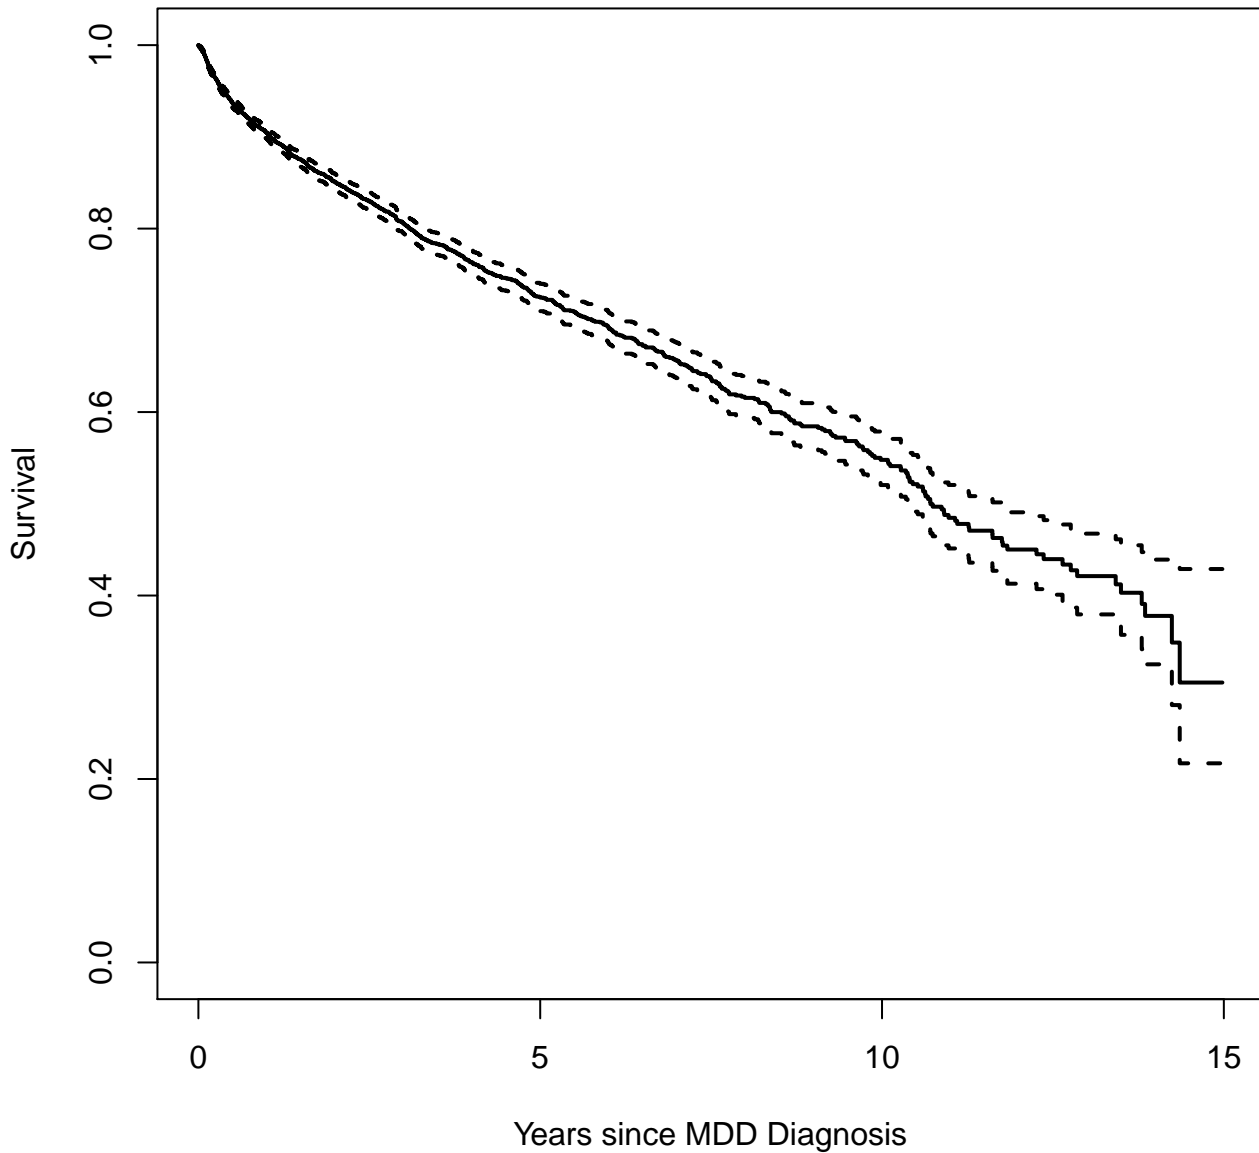

Supplementary Figure 3

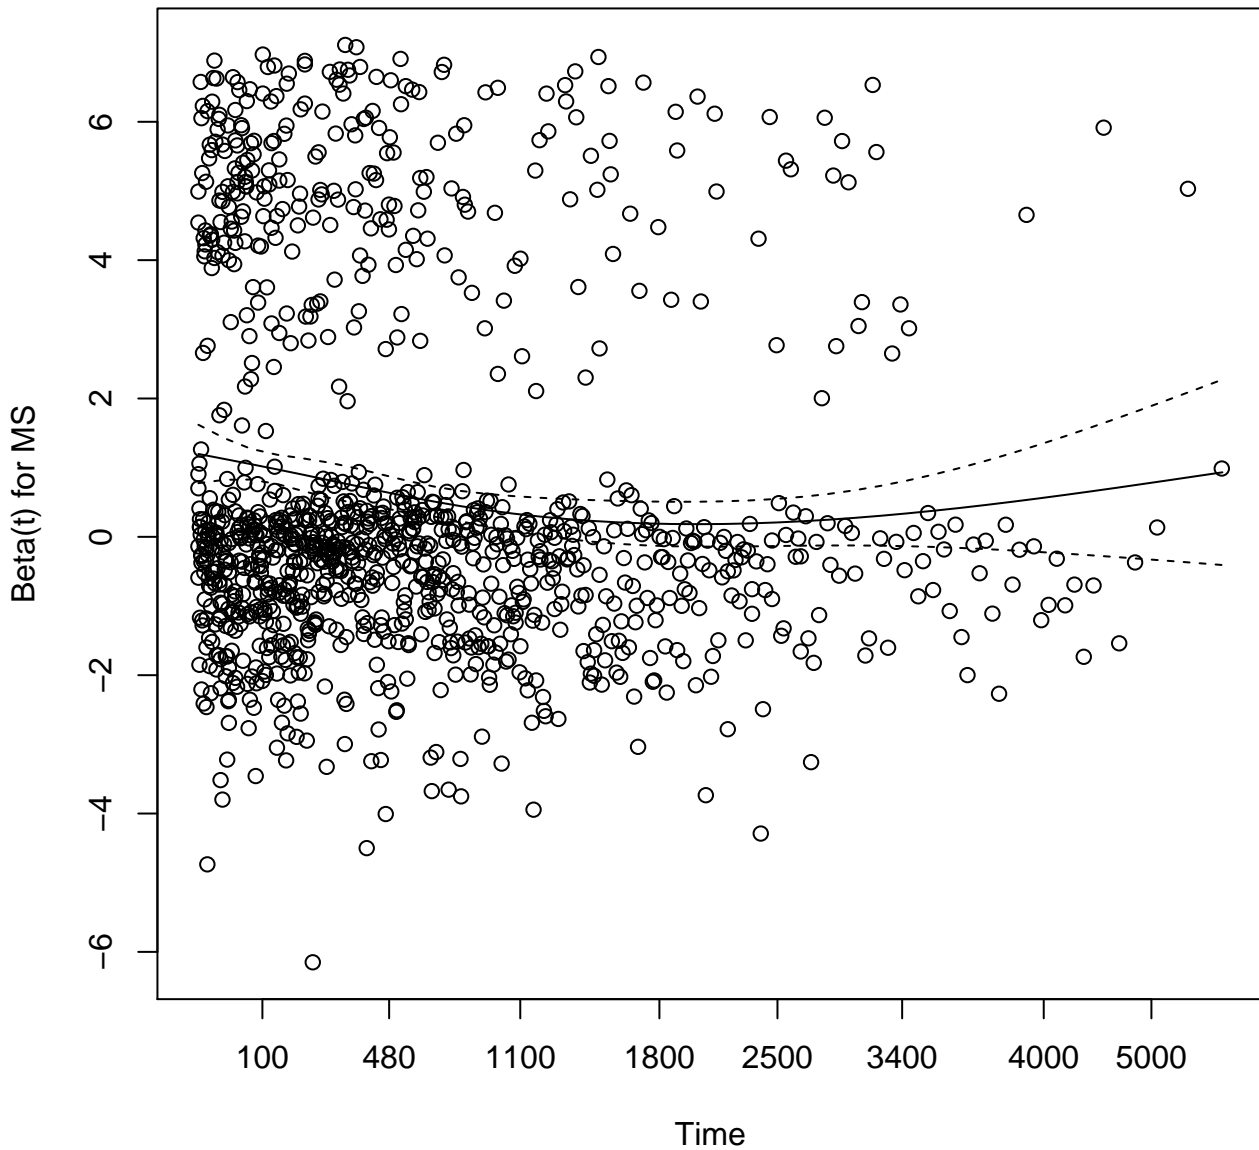

# Supplementary Figure 4

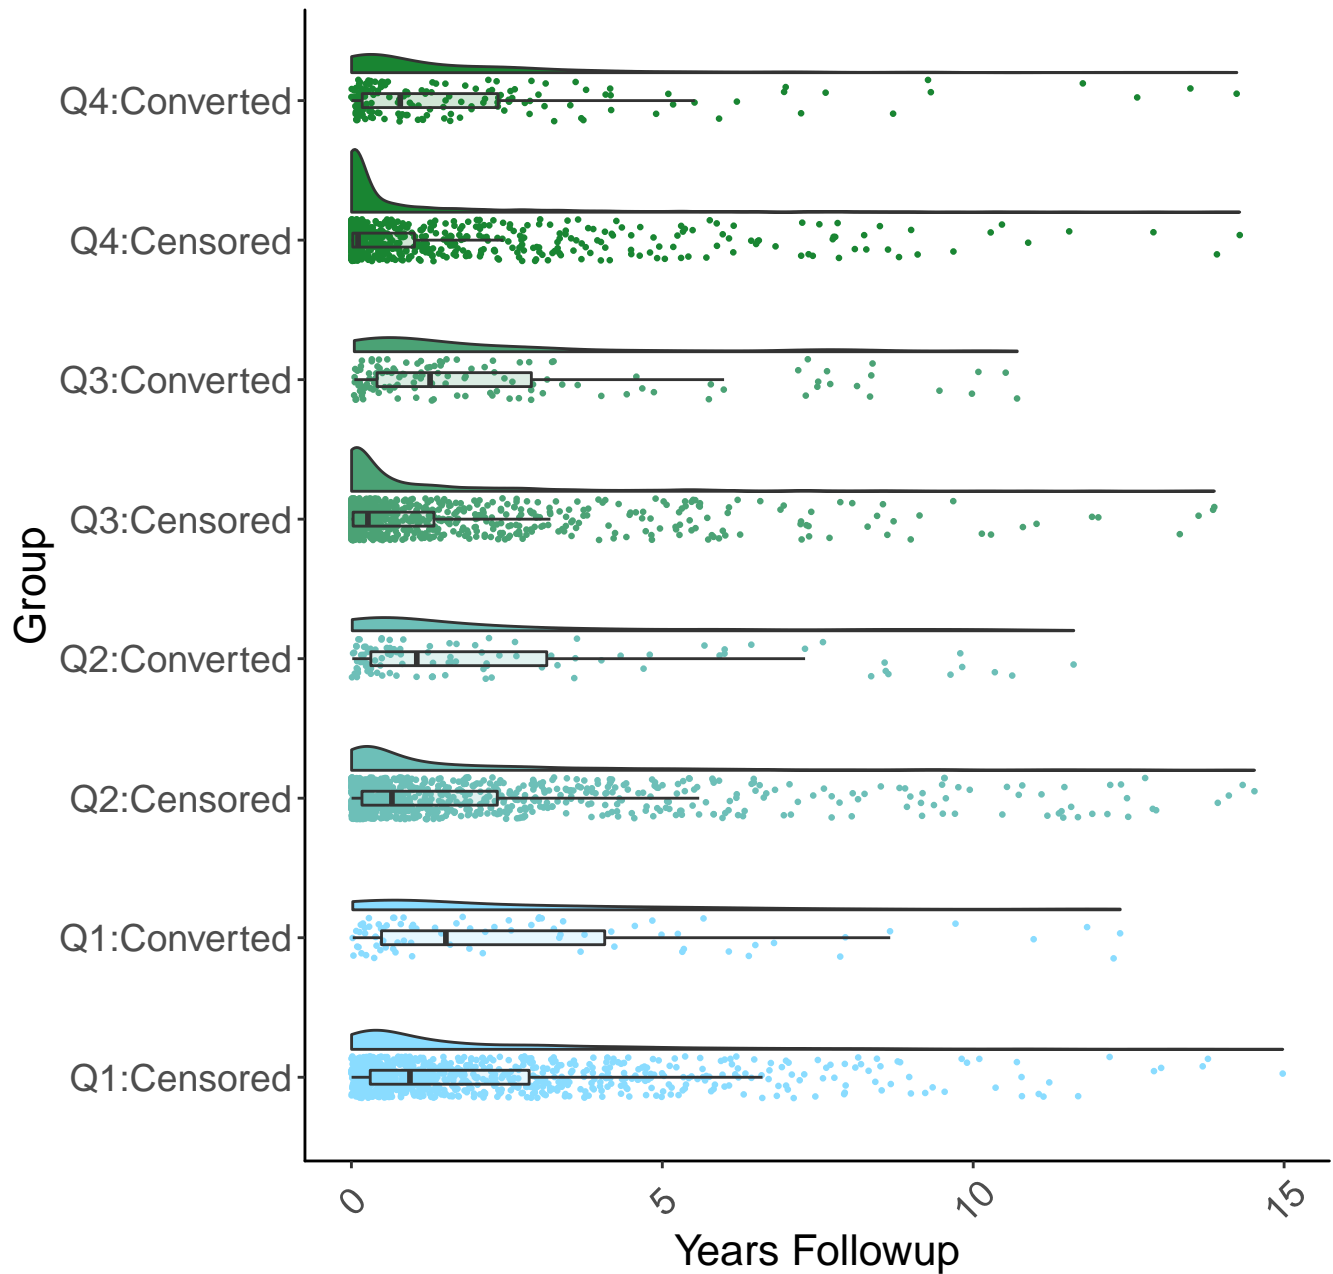

Supplementary Figure 5A

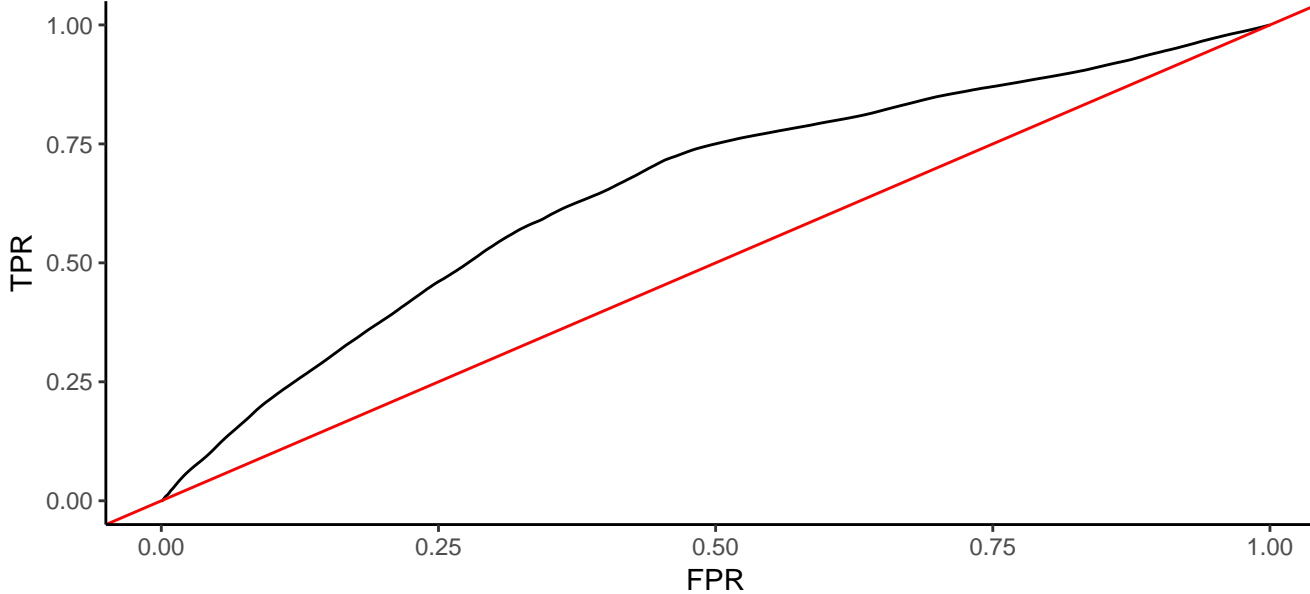

Supplementary Figure 5B

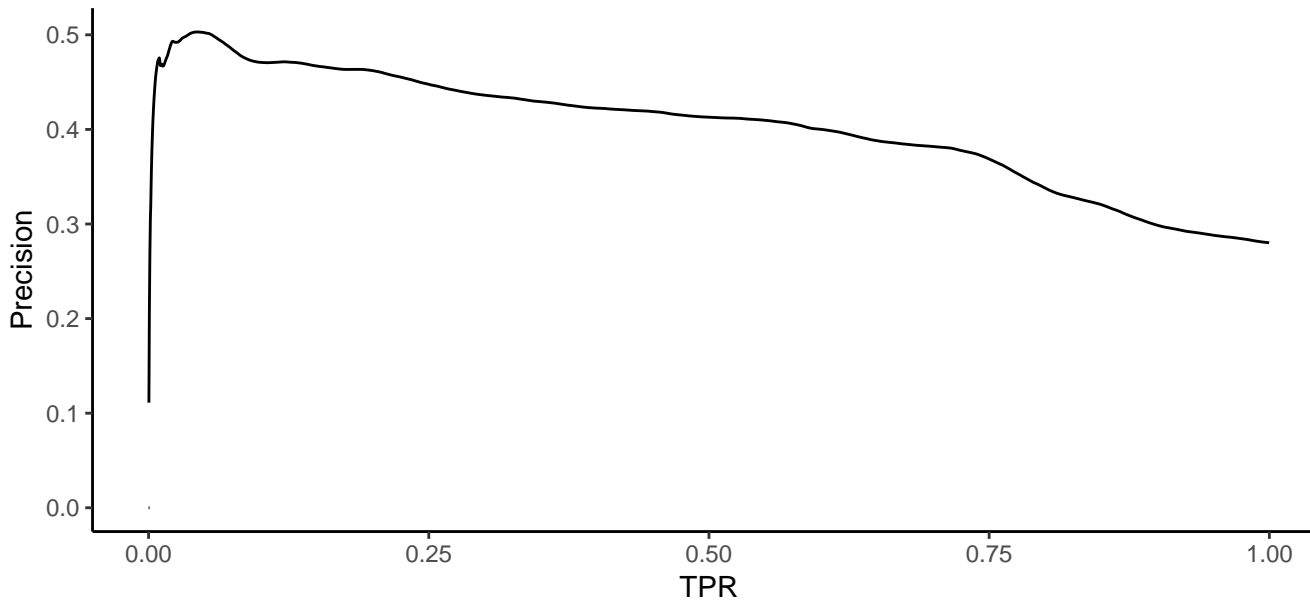

# Supplementary Figure 6

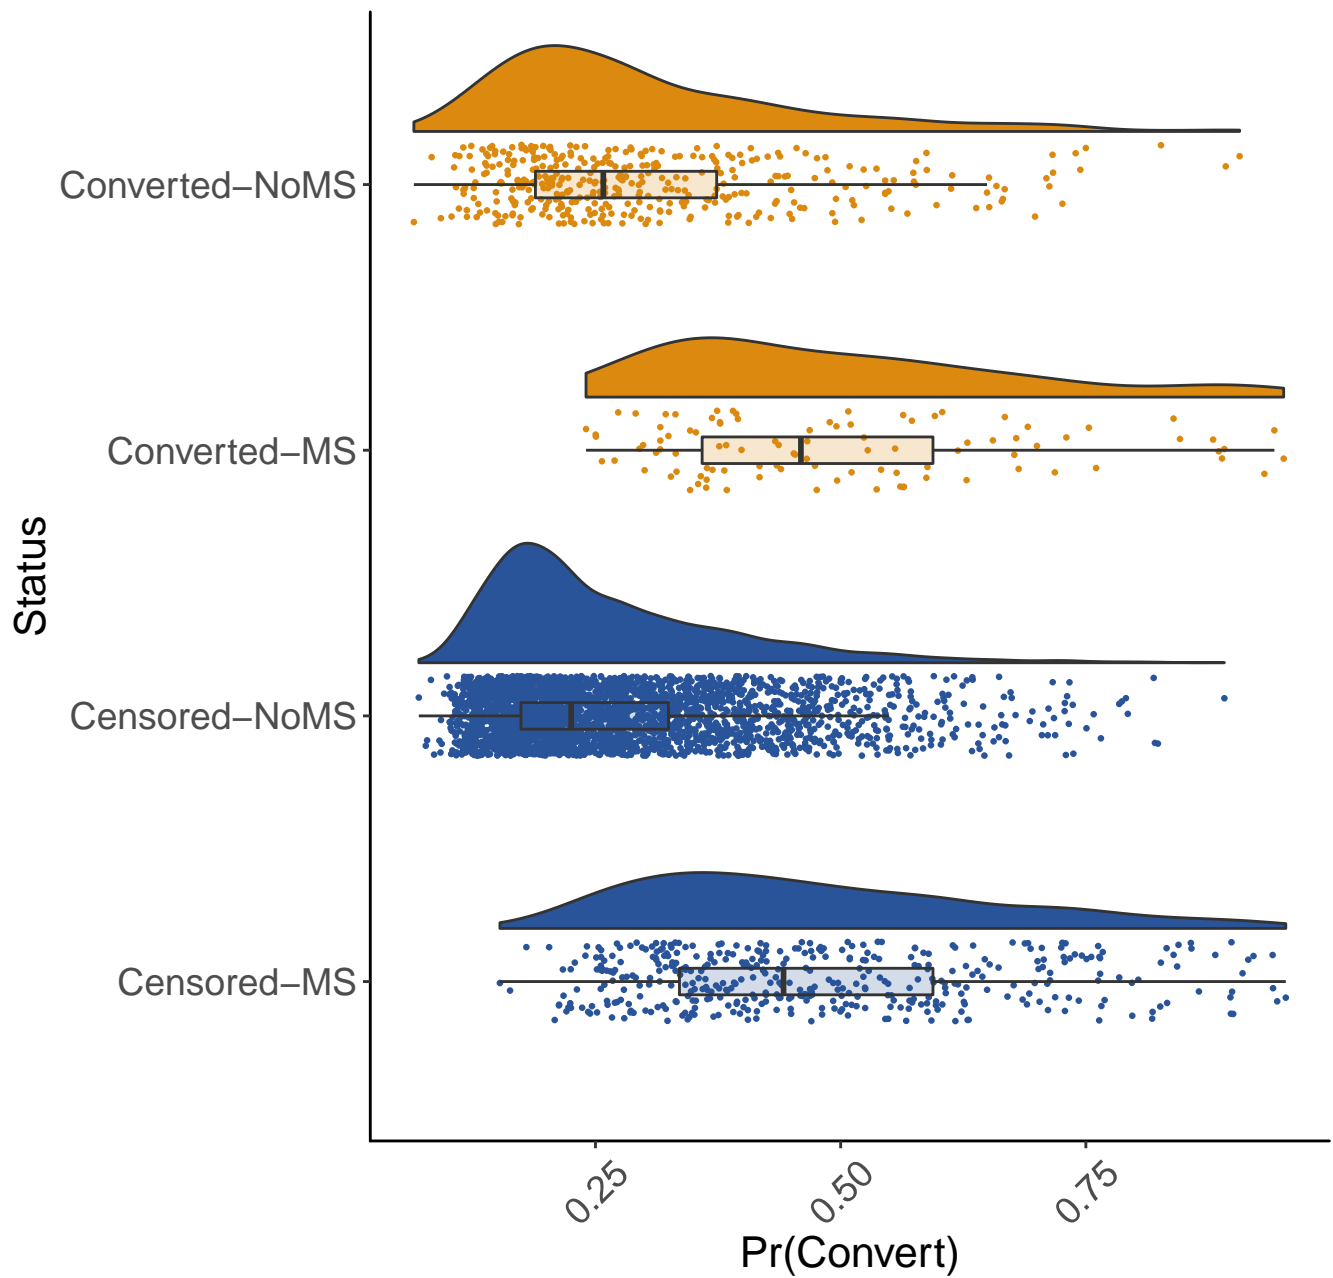

# Supplementary Figure 7

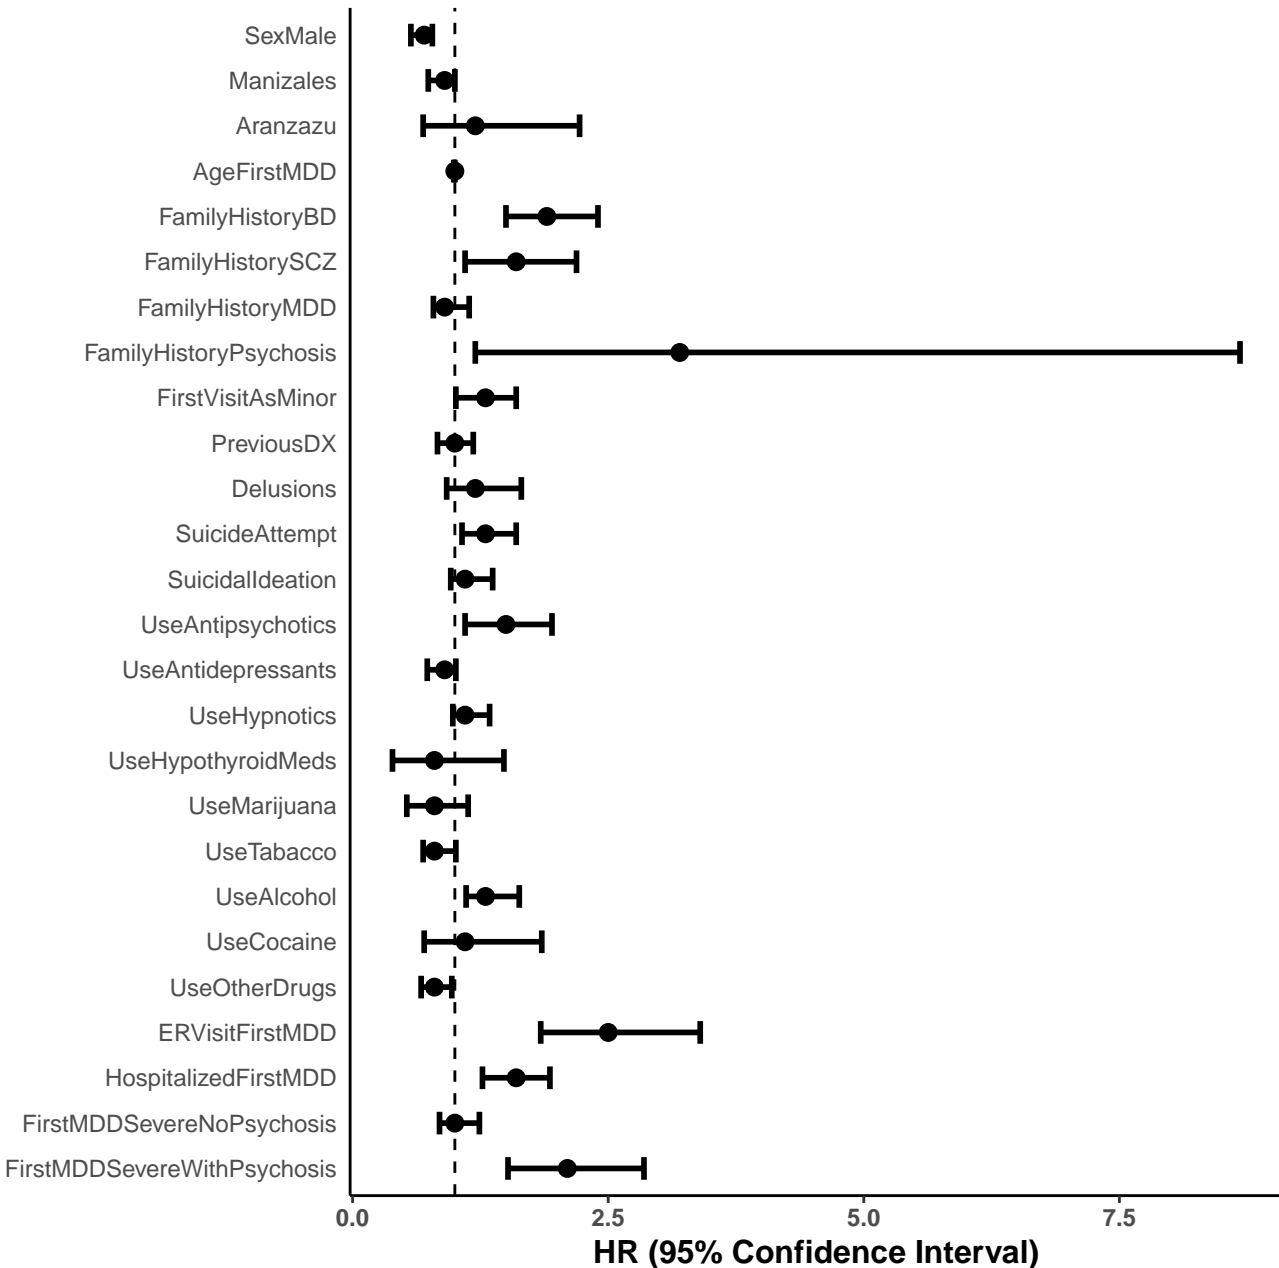

# Supplementary Figure 8A

UseAntidepressants

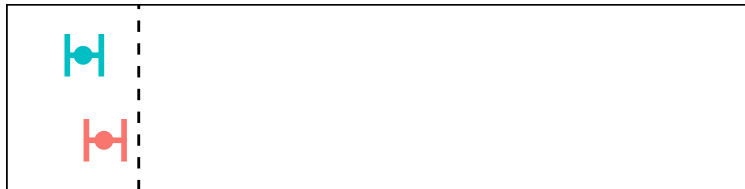

UseAntipsychotics

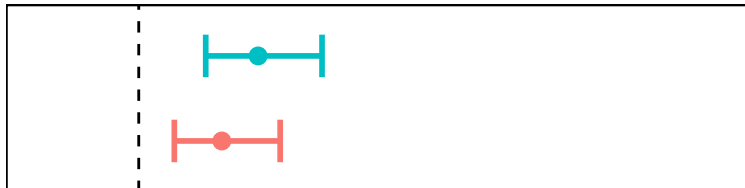

UseHypnotics

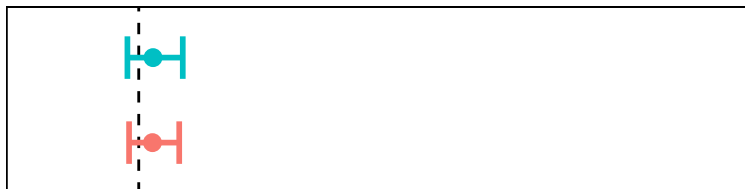

UseHypothyroidMeds

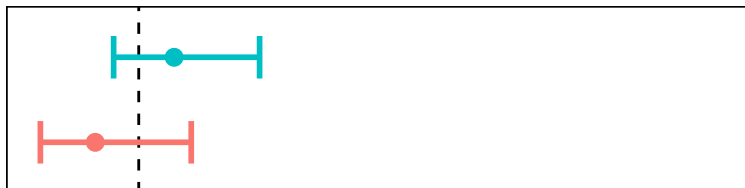

UseMoodStabilizers

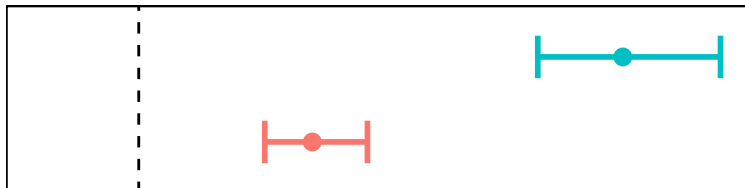

UseOtherDrugs

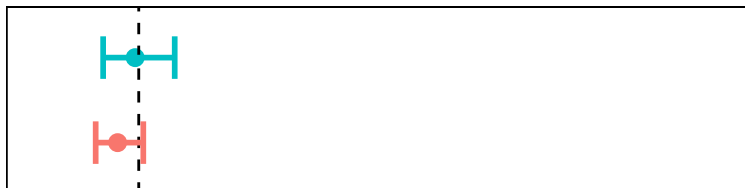

Model

- Baseline
- TimeVarying

Hazard Ratio (95% Confidence Interval)



Supplementary Figure 8B

UseAlcohol

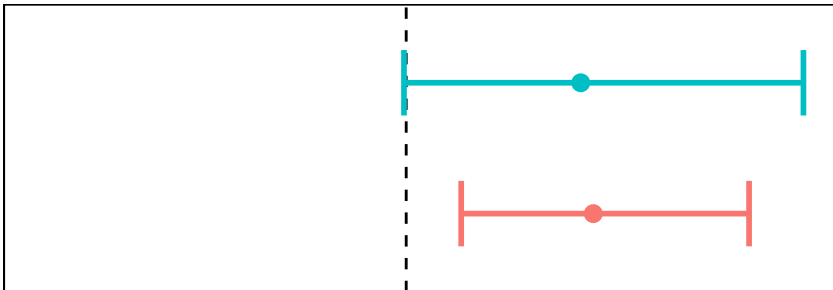

UseCocaine

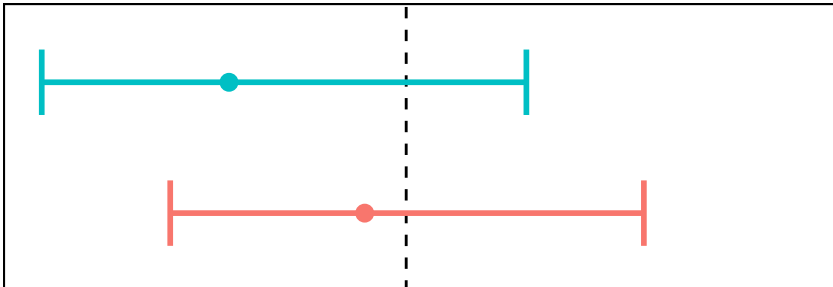

UseMarijuana

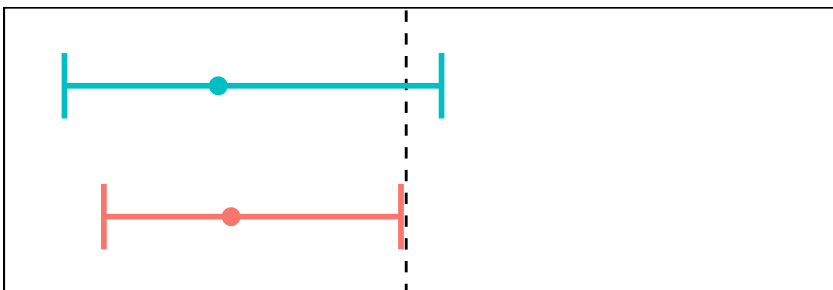

UseTabacco

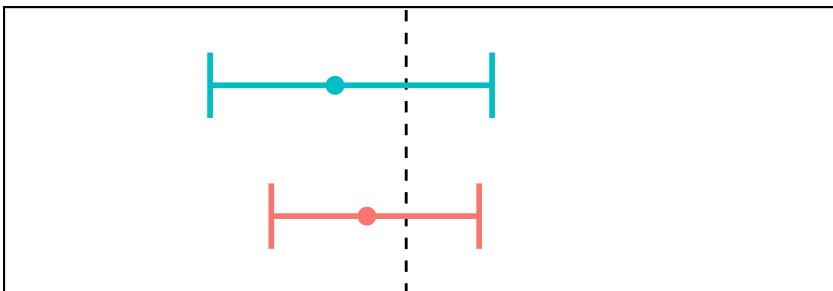

Hazard Ratio (95% Confidence Interval)

Model

- Baseline
- TimeVarying

Predictor

# Supplementary Figure 8C

ERVisitFirstMDD

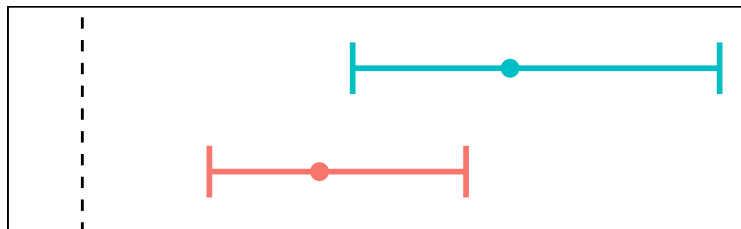

HospitalizedFirstMDD

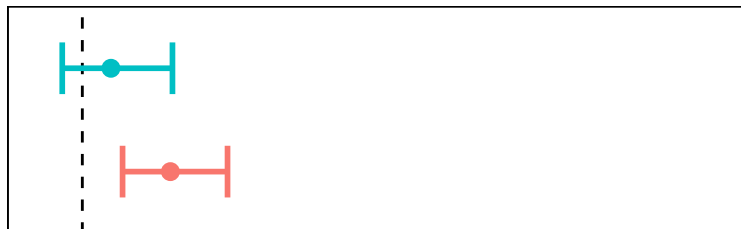

Delusions

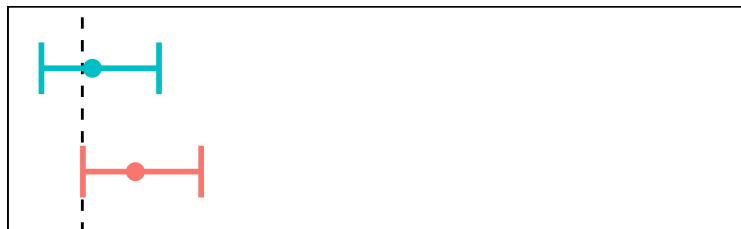

SuicideAttempt

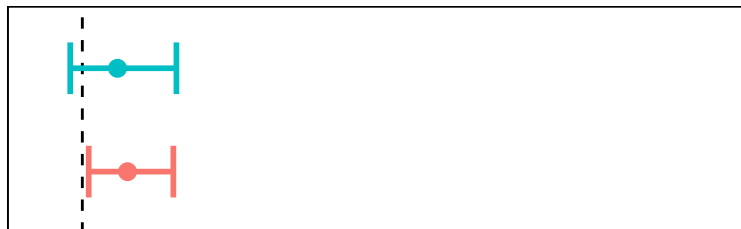

SuicidalIdeation

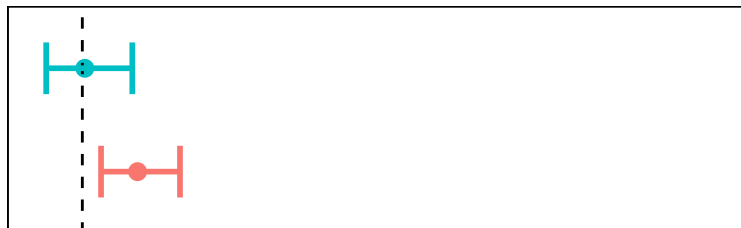

Hazard Ratio (95% Confidence Interval)

Model

- Baseline
- TimeVarying

Predictor

# Supplementary Figure 9

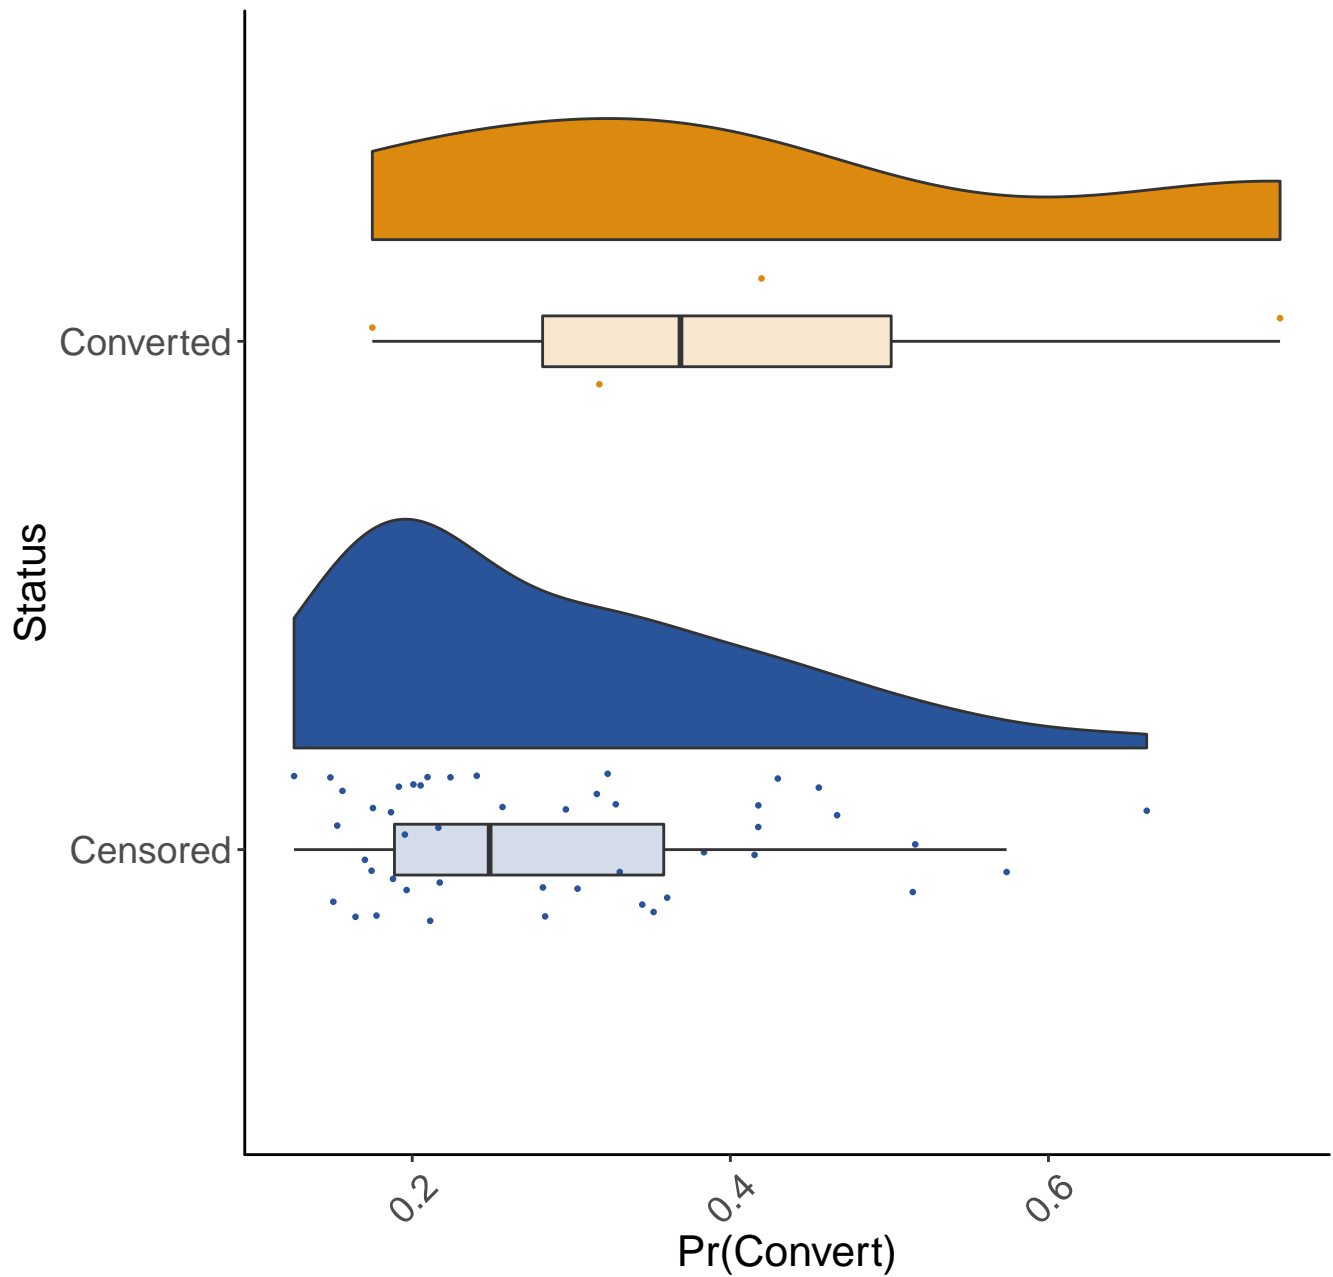

Supplementary Table 1. Hazard Ratio (HR), lower (LL.CI) and upper (UL.CI) 95% confidence intervals and p-value (P) for the null hypothesis that the HR=1. Results are from the multivariate model applied to the training data

| <b>Variable</b>             | <b>HR</b> | <b>LL.CI</b> | <b>UL.CI</b> | <b>P</b> |
|-----------------------------|-----------|--------------|--------------|----------|
| SexMale                     | 0.7       | 0.61         | 0.79         | 8.05E-08 |
| Manizales                   | 0.8       | 0.73         | 0.94         | 3.60E-03 |
| Aranzazu                    | 1.4       | 0.88         | 2.11         | 1.62E-01 |
| AgeFirstMDD                 | 1         | 0.99         | 1            | 2.36E-01 |
| FamilyHistoryBD             | 1.8       | 1.47         | 2.23         | 2.00E-08 |
| FamilyHistorySCZ            | 1.5       | 1.08         | 1.98         | 1.45E-02 |
| FamilyHistoryMDD            | 0.9       | 0.81         | 1.11         | 5.01E-01 |
| FamilyHistoryPsychosis      | 1.7       | 0.72         | 3.93         | 2.33E-01 |
| FirstVisitAsMinor           | 1.3       | 1.03         | 1.52         | 2.41E-02 |
| PreviousDX                  | 0.9       | 0.75         | 1.02         | 8.30E-02 |
| Delusions                   | 1.3       | 1            | 1.58         | 4.71E-02 |
| SuicideAttempt              | 1.2       | 1.03         | 1.44         | 2.05E-02 |
| SuicidalIdeation            | 1.3       | 1.09         | 1.47         | 1.98E-03 |
| UseAntipsychotics           | 1.5       | 1.21         | 1.82         | 1.76E-04 |
| UseAntidepressants          | 0.8       | 0.7          | 0.91         | 1.21E-03 |
| UseMoodStabilizers          | 2         | 1.73         | 2.33         | 2.31E-20 |
| UseHypnotics                | 1.1       | 0.94         | 1.24         | 2.64E-01 |
| UseHypothyroidMeds          | 0.7       | 0.43         | 1.31         | 3.06E-01 |
| UseMarijuana                | 0.7       | 0.56         | 0.99         | 4.42E-02 |
| UseTabacco                  | 0.9       | 0.8          | 1.11         | 4.70E-01 |
| UseAlcohol                  | 1.3       | 1.08         | 1.5          | 3.95E-03 |
| UseCocaine                  | 0.9       | 0.65         | 1.35         | 7.34E-01 |
| UseOtherDrugs               | 0.9       | 0.75         | 1.03         | 1.02E-01 |
| ERVisitFirstMDD             | 2.2       | 1.62         | 2.86         | 1.47E-07 |
| HospitalizedFirstMDD        | 1.4       | 1.2          | 1.71         | 8.49E-05 |
| FirstMDDSevereNoPsychosis   | 1         | 0.89         | 1.22         | 6.23E-01 |
| FirstMDDSevereWithPsychosis | 1.9       | 1.46         | 2.41         | 7.08E-07 |

Supplementary Table 2. Associations of covariates to antidepressant use

| <b>Variable</b>             | <b>logOR</b> | <b>logOR_SE</b> | <b>P-value</b> |
|-----------------------------|--------------|-----------------|----------------|
| SexMale                     | 0.032        | 0.049           | 5.10E-01       |
| PreviousDX                  | 1.153        | 0.072           | 5.08E-58       |
| FirstVisitAsMinor           | 0.090        | 0.056           | 1.10E-01       |
| ERVisitFirstMDD             | 0.361        | 0.131           | 5.92E-03       |
| HospitalizedFirstMDD        | -0.834       | 0.047           | 3.36E-71       |
| FirstMDDSevereWithPsychosis | -1.136       | 0.103           | 2.55E-28       |
| FirstMDDSevereNoPsychosis   | -0.384       | 0.049           | 5.77E-15       |
| UseAntipsychotics           | -0.046       | 0.096           | 6.29E-01       |
| UseMoodStabilizers          | -0.082       | 0.068           | 2.31E-01       |
| SuicideAttempt              | -0.271       | 0.056           | 1.64E-06       |
| SuicidalIdeation            | 0.061        | 0.052           | 2.44E-01       |
| Delusions                   | -0.366       | 0.095           | 1.10E-04       |
| FamilyHistoryBD             | -0.137       | 0.114           | 2.31E-01       |
| FamilyHistoryMDD            | 0.297        | 0.072           | 3.31E-05       |
